# Supplementary material for: Synthesis of Novel Polymer-Assisted Organic-Inorganic Hybrid Nanoflowers and Their Application in Cascade Biocatalysis
Source: MDPI journal article supplement (doi:10.3390/molecules28020839), 2023-01-14
Supplement: s1 [file s1]

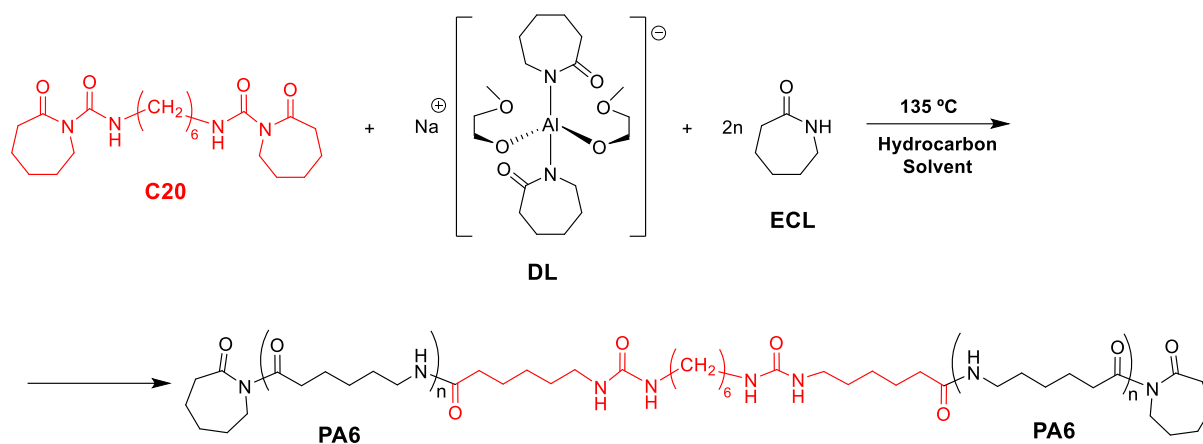

**Figure S1.** Chemical reactions occurring during AAROP of  $\epsilon$ -caprolactam to PA6 MP. The chemical structure of the C20 imide activator and of the AAROP initiator dicaprolactamato-bis-(2-methoxyethoxy)-aluminate (DL) are also opresented.

**Table S1.** Elemental analysis of PANF samples by SEM/EDX with ZAF corrections.

| Element, wt. % | Sample denomination |      |          |      |           |      |           |      |
|----------------|---------------------|------|----------|------|-----------|------|-----------|------|
|                | NF GH/PA            |      | NF GH&PA |      | NF G/PAiH |      | NF G&PAiH |      |
|                | ZNF                 | ZPA6 | ZNF      | ZPA6 | ZNF       | ZPA6 | ZNF       | ZPA6 |
| Cu K           | 32.2                | 2.5  | 35.5     | 2.3  | 30.4      | 0.0  | 27.4      | 2.5  |
| P K            | 11.5                | 1.2  | 11.6     | 1.3  | 9.5       | 1.4  | 9.3       | 1.8  |

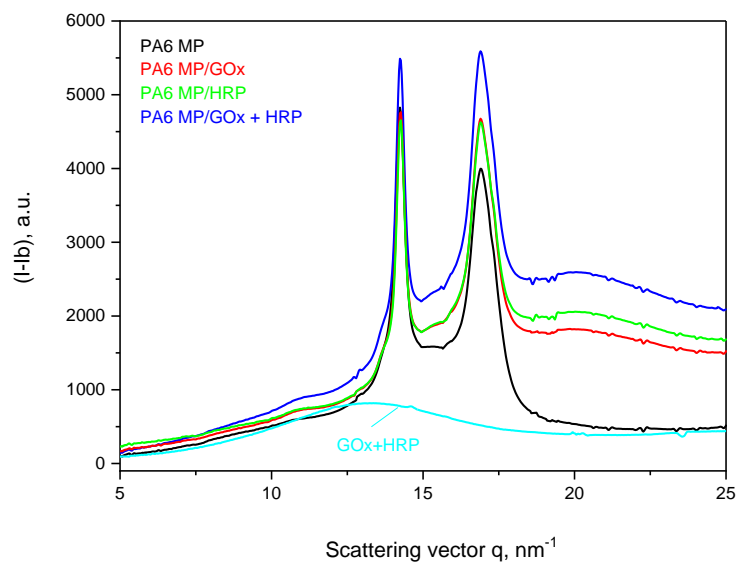

**Figure S2.** WAXS linear profiles of PA6 MP support before and after adsorption immobilization of GOx, HRP or GOx+HRP. The diffuse amorphous peak of the GOx+HRP mixture is also presented.

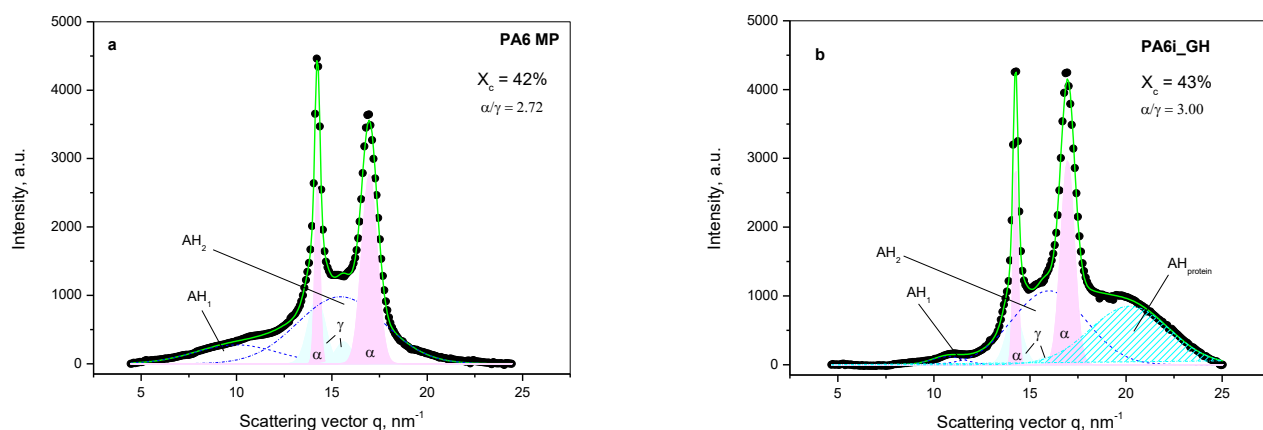

**Figure S3.** Deconvolution of the WAXS linear profiles of PA6 MP support before (a) and after (b) adsorption immobilization of GOx+HRP dyad. The new amorphous  $AH_{protein}$  peak at  $q = 20.2 \text{ nm}^{-1}$  found in the latter case is due to the H-bond formation of the absorbed enzymes with the support amorphous phase. Comparing the srystalline structure of PA6 MP and PA6\_GH shows no changes in the support crystalline structure after enzyme absorption immobilization: the crystallinity index  $X_c$  and the  $\alpha/\gamma$  polymorph relation remain quite similar, the differences being in the margin of the experimental error of the WAXS method.

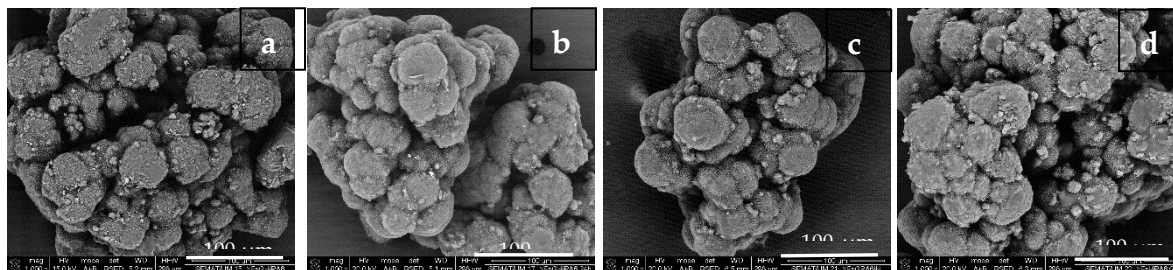

**Figure S4.** SEM micrographs of polymer-assisted hybrid nanoflowers (PANF) after the 6th catalytic cycle: (a) - NF GH/PA; (b) - NF GH&PA; (c) NF G/PAiH; (d) NG G&PAiH. The brighter dot areas contain residual NaCl from the PBS or  $\text{Cu}_3(\text{PO}_4)_2$  from the NF. For more details, see the main text.
